# Supplementary material for: Solution-grown aligned C60 single-crystals for field-effect transistors
Source: Royal Society of Chemistry journal article supplement (doi:10.1039/c3tc32431a), 2014-01-01
Supplement: c3tc32431a1.pdf [file c3tc32431a1.pdf]

## Supporting Information for Solution-grown aligned C<sub>60</sub> single-crystals for field-effect transistors

Hanying Li,<sup>\*a</sup> Congcheng Fan,<sup>a</sup> Michael Vosgueritchian,<sup>b</sup> Benjamin C-K. Tee,<sup>c</sup> and

Hongzheng Chen<sup>\*a</sup>

<sup>a</sup> MOE Key Laboratory of Macromolecular Synthesis and Functionalization, State Key Laboratory of Silicon Materials, Department of Polymer Science and Engineering, Zhejiang University, Hangzhou 310027, P. R. China. Fax: +86571-87953733; Tel: +86571-87952557; E-mail: hanying\_li@zju.edu.cn; hzchen@zju.edu.cn

<sup>b</sup> Department of Chemical Engineering, Stanford University, Stanford, California 94305, USA.

<sup>c</sup> Department of Electrical Engineering, Stanford University, Stanford, California 94305, USA.

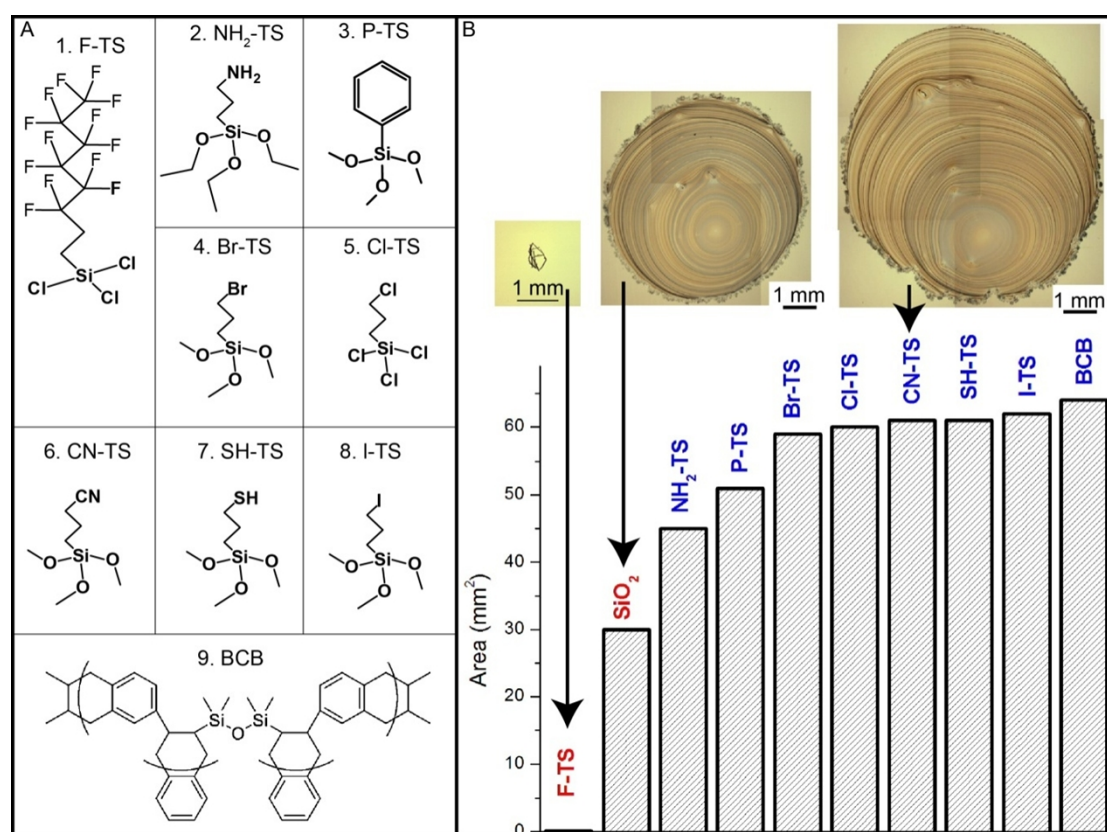

**Fig. S1** (A) The molecular structures of the chemicals used for surface modification of the wafer.

(B) The wettability of the C<sub>60</sub> solution (0.4 mg/mL in m-xylene) on the surfaces of the modified wafers. The wettability was characterized by the spreading area of a solution droplet (1 μL) on the wafers. The larger the area the droplet spreads onto, the better the wetting is.

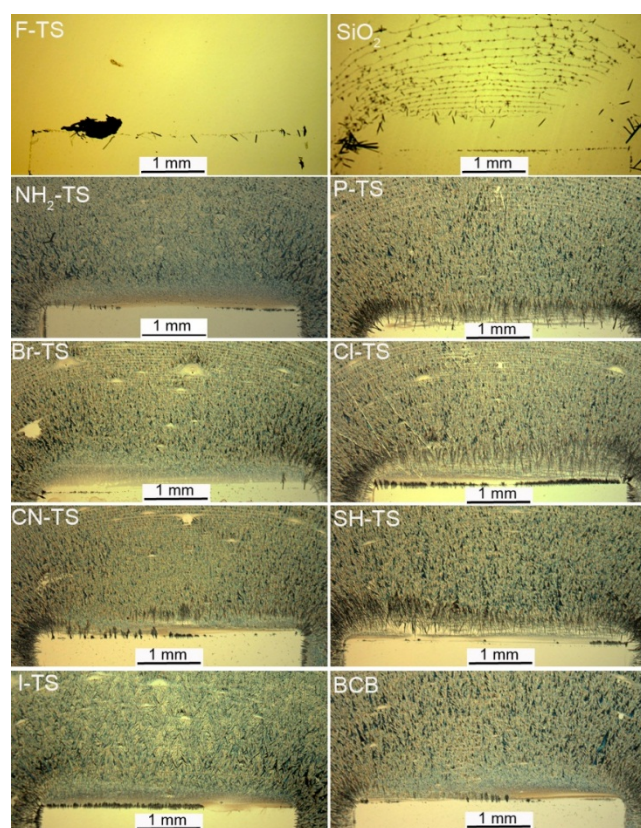

**Fig. S2** OM images of crystals grown from  $C_{60}$  solutions (0.4 mg/mL in m-xylene) on varied substrates.
